# Supplementary material
Source: publisher site journal article supplement (http://www.spandidos-publications.com/202/downloadSupplementary)

Figure S1. Relative expression of myostatin mRNA in mice gastrocnemius. Data are presented as the mean  $\pm$  standard deviation (n=3). Statistical significance was determined by one-way ANOVA. #P<0.05 vs. NC. \*P<0.05 vs. Dex. NC, negative control; Mat-L, 100  $\mu$ M matrine; Mat-H, 200  $\mu$ M matrine; Dex, dexamethasone.

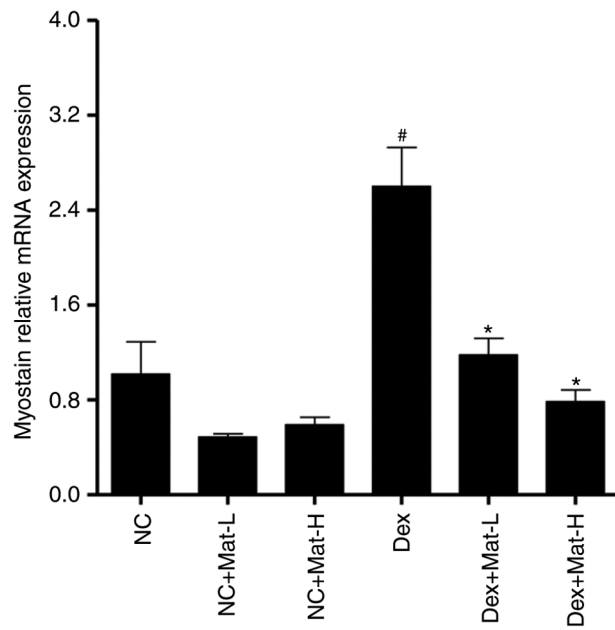

Supplement: Supplementary file 1 [file downloadSupplementary]
